# Supplementary material for: MicroRNA-encoding long non-coding RNAs
Source: PubMed Central journal article supplement (PMC2410135; doi:10.1186/1471-2164-9-236), 2008-05-21
Supplement: 1471-2164-9-236-S1.pdf [file 1471-2164-9-236-S1.pdf]

## **Additional file 1**

**File format: PDF**

**Title: Supplementary figures and tables**

### **Content:**

Figure S1: Detection of miRNAs with microarrays.

Figure S2: Detection of miRNAs with stem-loop RT-PCR.

Figure S3: Illustration of the 11 features used by PriMir.

Figure S4: The Performance of PriMir.

Figure S5: The score distribution of the five features that gave the strongest contribution pre-miRNA stem-loop identification.

Table S1: 22 ml-ncRNAs encoding known miRNAs

Table S2: Information on all 102 me-ncRNAs.

Table S3: List of probes for microarray.

Table S4: List of stem-loop RT-PCR primers

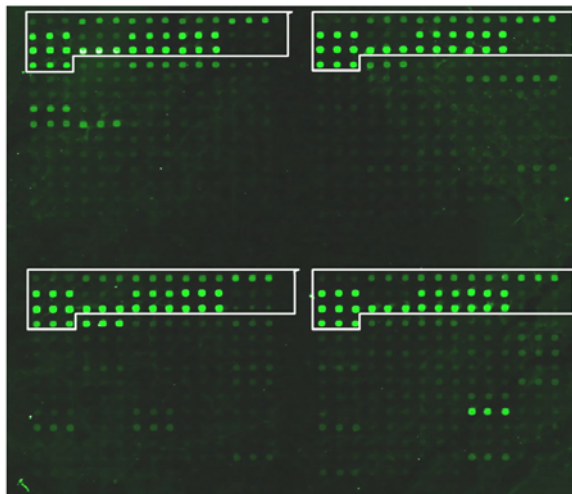

brain and thymus of 0-day neonate C57 BL/6 mice

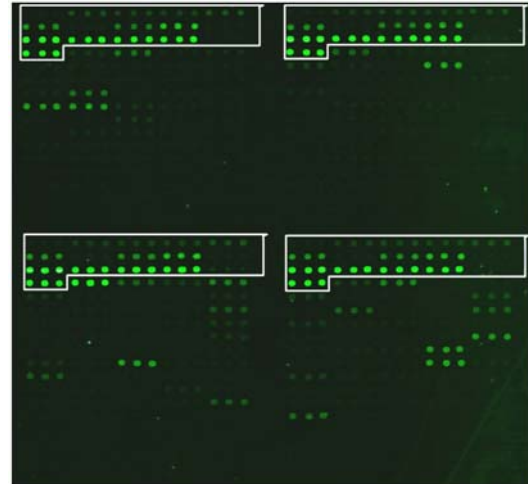

brain of male adult C57 BL/6 mice

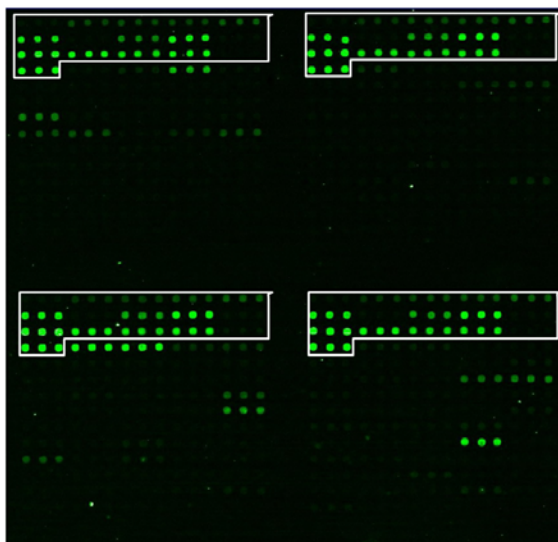

15 days old fetuses

**Figure S1.** Detection of miRNAs with microarrays. Low molecular weight RNAs (<200 nt) from (1) brain and thymus of 0-day neonate mice, (2) brain of adult male mice, and (3) 15 days old fetuses of C57 BL/6 mice were hybridized to microarrays with probes specific for the predicted miRNAs. White frames indicate control probes.

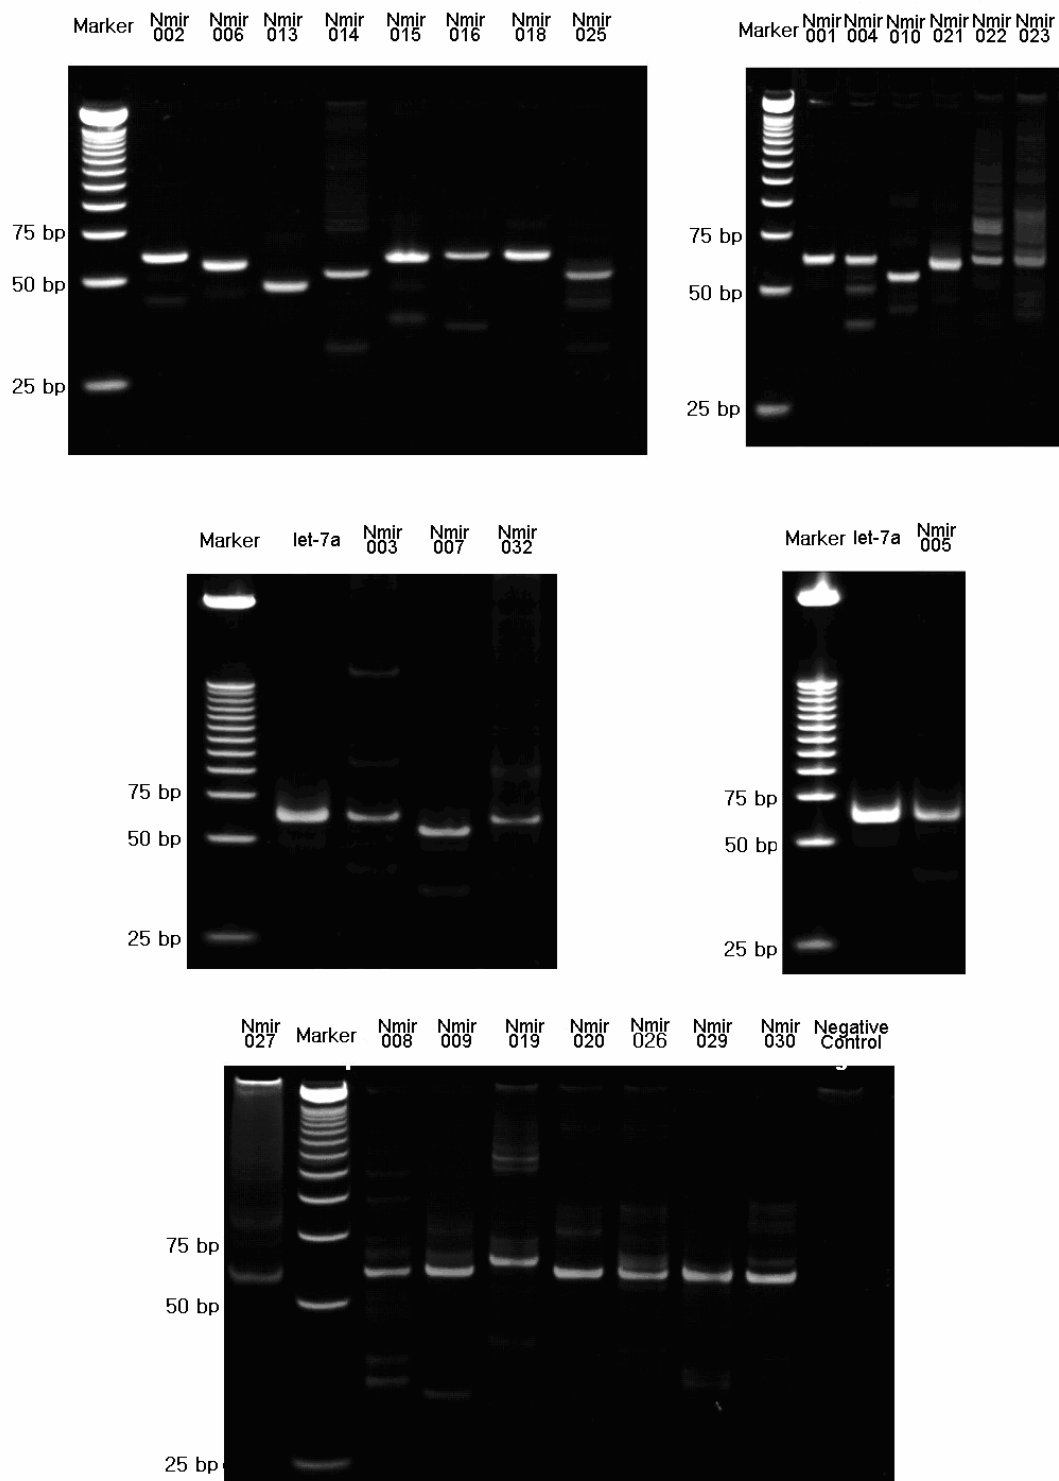

Figure S2. Detection of miRNAs with stem-loop RT-PCR. Low molecular weight (<200nt) RNAs were extracted from different tissues in 3 developmental stages: 1) brain and thymus of 0-day neonate C57 BL/6 mice, 2) brain of male adult C57 BL/6 mice, and 3) whole body of 15-day embryonic C57 BL/6 mice, and then mixed. 10 ng of the mixed RNAs were used as templates for RT reactions. Stem-loop RT-PCR of

let-7a was included as a positive control; and the same RT-PCR reaction as Nmir\_002 was performed without reverse transcriptase as a negative control. 26 of the 32 miRNAs microarray detected were detected by stem-loop RT-PCR.

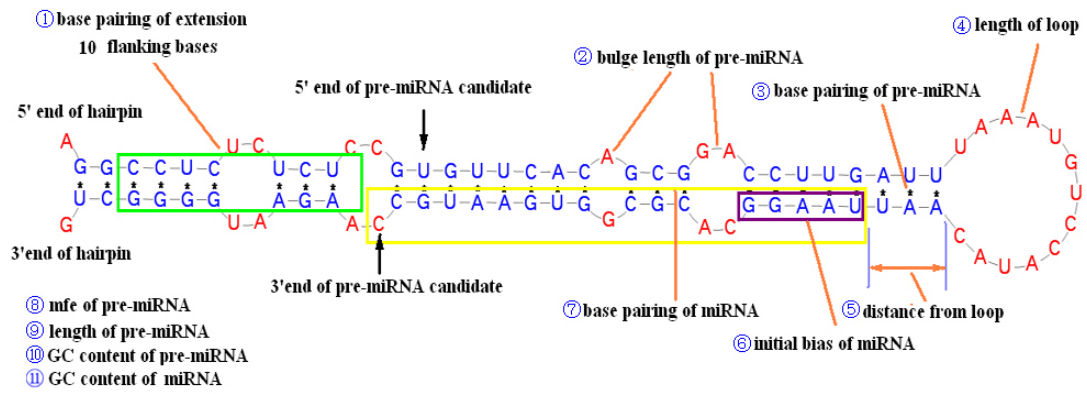

**Figure S3.** Illustration of the 11 features used by PriMir

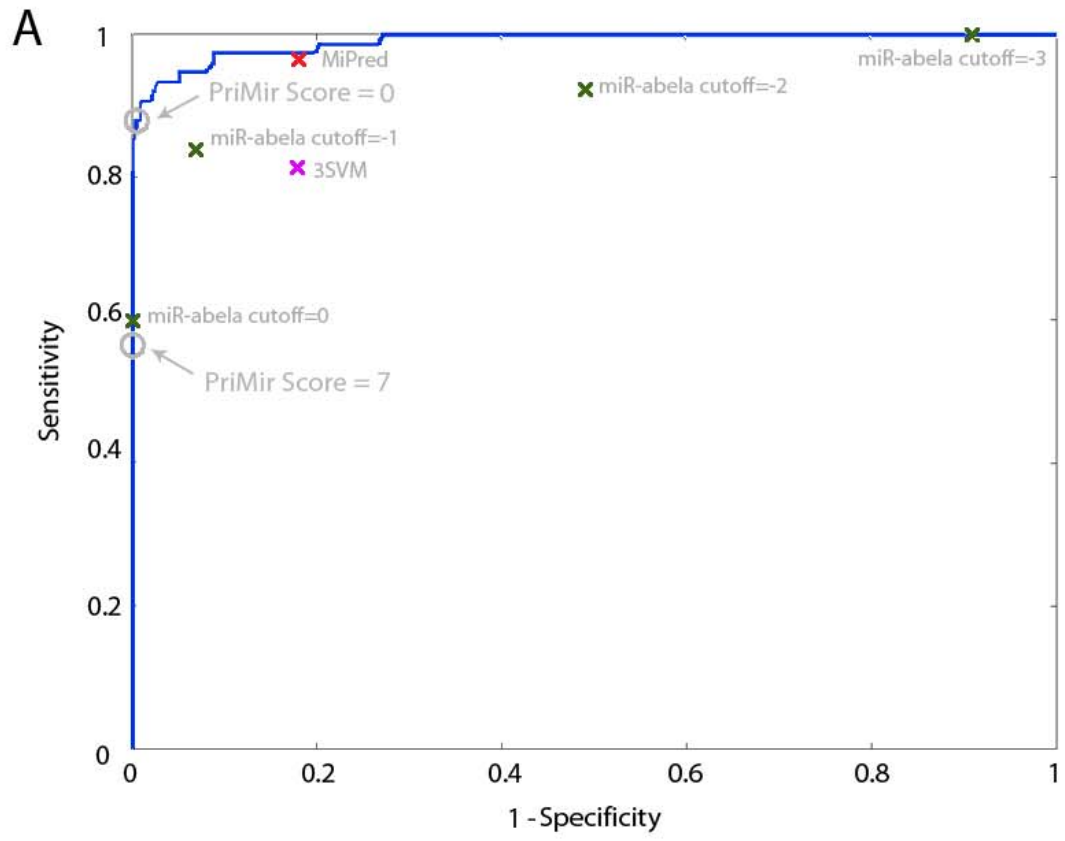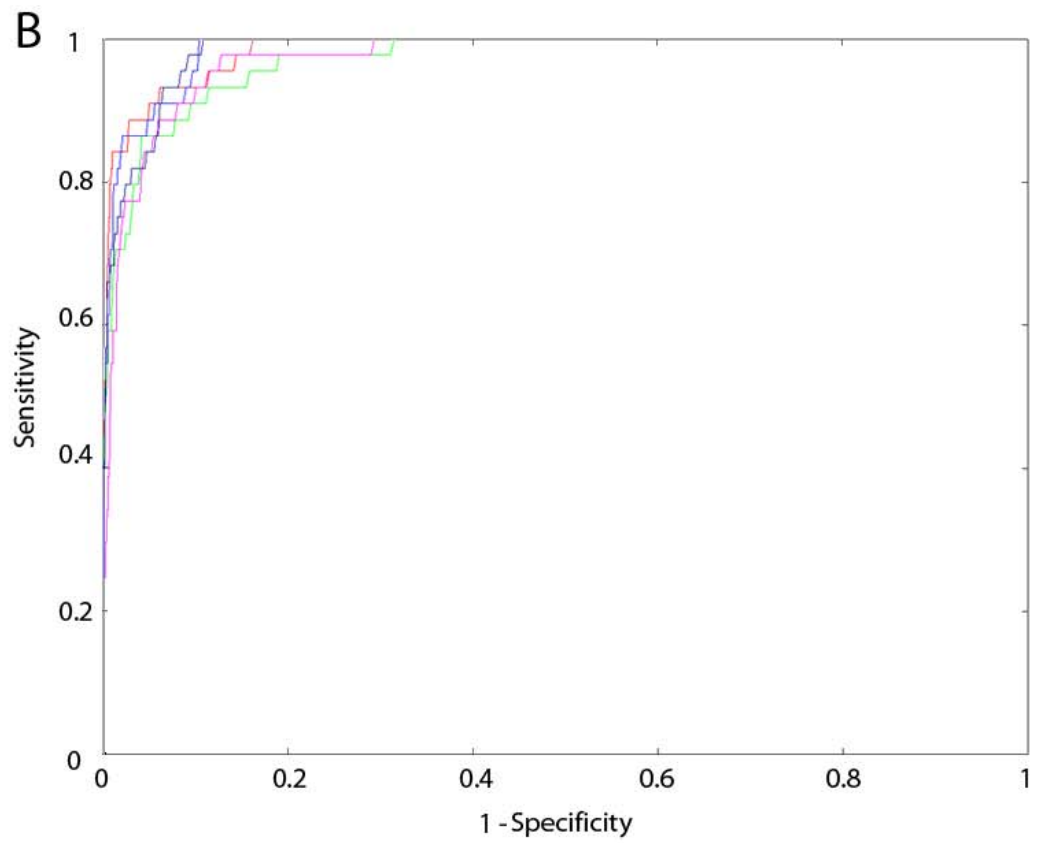

Figure S4: The performance of PriMir. A. The PriMir ROC curve. The blue line represents the PriMir ROC curve. The Area Under Curve (AUC) is about 0.99. A PriMir score of 0 corresponds to a specificity of 0.99 and a sensitivity of 0.893, and the PriMir score of 7 corresponds to a specificity of 1 and a sensitivity of 0.56. The red crosses indicate sensitivity and 1-specificity for MiPred, the pink cross indicates the prediction results for 3SVM, and the green crosses indicates prediction results obtained with miR-abela with three different cutoff values. B. ROC-curves from the cross-validation of PriMir. The training and background sets were both divided evenly into five parts. Four parts were used for training of PriMir, and remaining set was used to test the trained PriMir. The five different curves represent the results of five independent tests, resulting in AUC values of 0.984, 0.971, 0.984, 0.972 and 0.983.

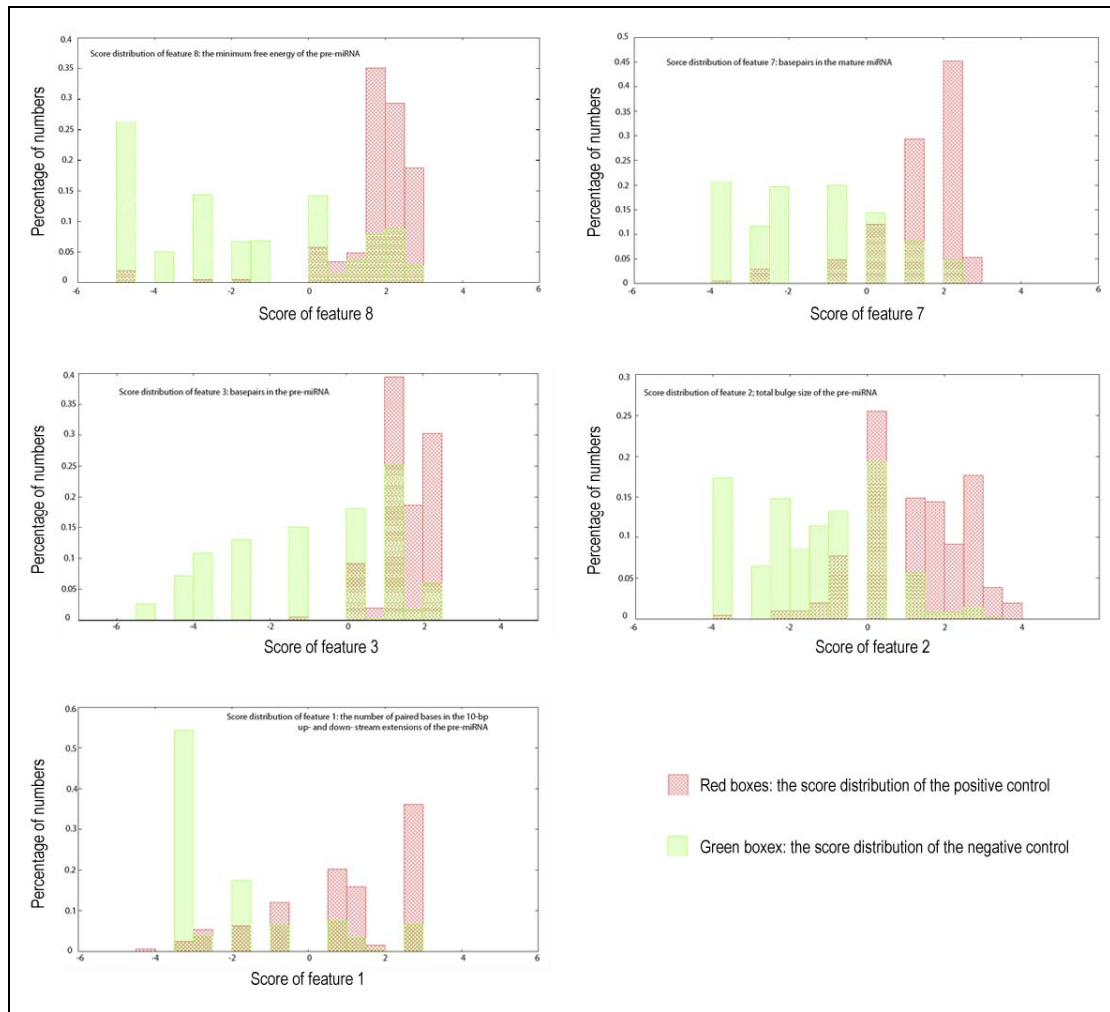

Figure S5: The score distribution of the five features that gave the strongest contribution pre-miRNA stem-loop identification.



Table S1. 22 ml-ncRNAs encoding known miRNAs

| me-ncRNA ID | Clone Id in FANTOM3 | miRNA          |
|-------------|---------------------|----------------|
| MENC_001    | D630033A02          | mmu-let-7i     |
| MENC_002    | A930011O12          | mmu-mir-124a-1 |
| MENC_003    | 8030499P14          | mmu-mir-130a   |
| MENC_004    | F930027K19          | mmu-mir-144    |
|             |                     | mmu-mir-451    |
| MENC_005    | 4833445I07          | mmu-mir-191    |
|             |                     | mmu-mir-425    |
| MENC_006    | G630041I22          | mmu-mir-202    |
| MENC_007    | 4631405K08          | mmu-mir-205    |
| MENC_008    | 4831414J02          | mmu-mir-133b   |
|             |                     | mmu-mir-206    |
| MENC_009    | 6720427I07          | mmu-let-7d     |
| MENC_010    | C030026K10          | mmu-mir-22     |
| MENC_011    | 9130016C20          |                |
| MENC_012    | 2210403K04          |                |
| MENC_013    | 5930426H09          | mmu-mir-331    |
| MENC_014    | D230012O04          | mmu-mir-214    |
| MENC_015    | 9830169G21          | mmu-mir-223    |
| MENC_016    | 5330411G14          | mmu-mir-377    |
| MENC_017    | B230304K20          | mmu-mir-378    |
| MENC_018    | D930047H10          | mmu-mir-138-2  |
| MENC_019    | B130046N22          | mmu-mir-100    |
| MENC_020    | E130002N09          | mmu-mir-181b-1 |
| MENC_021    | 2010103J01          | mmu-mir-215    |
| MENC_022    | 6430411K18          | mmu-mir-433    |

Table S2: Information on all 102 me-ncRNAs.

The table includes data on all me-ncRNAs corresponding to previously known miRNAs and experimentally verified miRNA, and data on me-ncRNA candidates without experimental support

| ID of me-ncRNAs | Clone Id in FANTOM3 | sequence of the contained pre-miRNA                                           | miRNA sequence            | name of miRNA <sup>a</sup>   | Detected by microarray <sup>b</sup> | RT-PCR <sup>b</sup> | Conserved <sup>c</sup> |           |
|-----------------|---------------------|-------------------------------------------------------------------------------|---------------------------|------------------------------|-------------------------------------|---------------------|------------------------|-----------|
|                 |                     |                                                                               |                           |                              |                                     |                     | Me-ncRNA               | Pre-miRNA |
| MENC_001        | D630033A02          | UGAGGUAGUAGUUUGUCGUGUGGUCGGGUUGUGACAUUGCCCGCUGUGGAGAUACUCGCGCAAGCUACUGCCUUGCU | UGAGGUAGUAGUUUGUCGUGUGGUC | mmu-let-7i (miRBase 8.0)     | D                                   | NA                  | NC                     | C         |
| MENC_002        | A930011012          | UGUUCACAGCGGACCUUGAUUUAAAUGUCCAACAUAUAAAGGCACGCGGUGAAUGCCAA                   | UAAGGCACGCGGUGAAUGCC      | mmu-mir-124a-1 (miRBase 8.0) | D                                   | NA                  | NC                     | C         |
| MENC_003        | 8030499P14          | GCUCUUUCACAUUGUCUACUGCUAACGUGUACCGGAGCAGUGCAUUGUUAAAAGGGCAU                   | CAGUGCAUUGUUAAAAGGGCAU    | mmu-mir-130a (miRBase 8.0)   | D                                   | NA                  | NC                     |           |
| MENC_004        | F930027K19          | GGGAUAUCAUAUACUGUAAGUUUGUGAUGAGACACUACAGUAUAGAUAGUAUCUAG                      | GGGAUAUCAUAUACUGUAA       | Nmir_001                     | D                                   | D                   | NC                     | C         |
|                 |                     | UACAGUAUAGAUAGUACUAG                                                          | UACAGUAUAGAUAGUACUAG      | mmu-mir-144 (miRBase 8.0)    | D                                   | NA                  |                        |           |
|                 |                     | AAACCGUUACCAUACUGAGUUAGUAUUGUAACGGUUCUC                                       | AAACCGUUACCAUACUGAGUU     | mmu-mir-451 (miRBase 8.0)    | ND                                  | NA                  |                        | C         |
| MENC_005        | 4833445I07          | CAACGGAAUCCAAAAGCAGCUGUUGUCUCCAGAGCAUCCAGCUCACUUGGAUUUCGUUCC                  | CAACGGAAUCCAAAAGCAGCU     | mmu-mir-191 (miRBase 8.0)    | D                                   | NA                  | C                      | C         |
|                 |                     | AUGACACGAUCACUCCCGUUGAGUGGGCACCAAGAAGCCAUCGGAAUUGUGUCCGCC                     | AUCGGAAUUGUGUCCGCC        | mmu-mir-425 (miRBase 8.0)    | NA                                  | NA                  |                        | C         |
| MENC_006        | G630041I22          | UCCUAUGCAUAUACUUCUUGUGGAUCUGGUCUAAAGAGGUAUAGCGCAUGGGAAGA                      | AGAGGUAUAGCGCAUGGGAAGA    | mmu-mir-202 (miRBase 8.0)    | D                                   | NA                  | NC                     | C         |
| MENC_007        | 4631405K08          | GUCCUUCAUUCCACCGGAGUCUGUCUUAUGCCAACCAGAUUUCAGUGGAGUGAAGCUCAG                  | UCCUUCAUUCCACCGGAGUCUG    | mmu-mir-205 (miRBase 8.0)    | D                                   | NA                  | NC                     | C         |
| MENC_008        | 4831414J02          | GCUGGCAAACGGAACCAAGUCCGUCUCCUGAGAGGUUUGGUCCCUUCAACCAGCUA                      | UUGGUCCCUUCAACCAGCUA      | mmu-mir-133b (miRBase 8.0)   | D                                   | NA                  | NC                     | C         |
|                 |                     | ACAUGCUCUUUAUACCUCAUAGAUUUCUACAGCACUAUGGAAUGUAAGGAAGUGUGUGG                   | UGGAAUGUAAGGAAGUGUGUGG    | mmu-mir-206 (miRBase 8.0)    | ND                                  | NA                  | NC                     | NC        |
| MENC_009        | 6720427I07          | AGAGGUAGUAGGUUGCAUAGUUUAGGGCAGAGAUUUUGCCACAAGGAGUUAACUUAACGACCUUGCUUUCU       | AGAGGUAGUAGGUUGCAUAGU     | mmu-let-7d (miRBase 8.0)     | D                                   | NA                  | NC                     | C         |
| MENC_010        | C030026K10          |                                                                               |                           |                              |                                     |                     | NC                     |           |
| MENC_011        | 9130016C20          | AGUUCUUCAGUGGCAAGCUUUUGUCCUGACCCAGCUAAAGCUGCCAGUUGAAGAACUGU                   | AAAGCUGCCAGUUGAAGAACUGU   | mmu-mir-22 (miRBase 8.0)     | D                                   | NA                  | NC                     | C         |
| MENC_012        | 2210403K04          |                                                                               |                           |                              |                                     |                     | NC                     |           |
| MENC_013        | 5930426H09          | UUCUAGGUAGGUCCAGGGAUCCAGAUCAAAACAGGCCUUGGGCCUUAUCCUAGAACC                     | GCCCUUGGGCCUUAUCCUAGAA    | mmu-mir-331 (miRBase 8.0)    | D                                   | NA                  | NC                     | C         |
| MENC_014        | D230012004          | UGCCUGUCUACACUUGCUGUGCAGAACAUCGUCUACCUUGUACAGCAGGCACAGACAGGCAGU               | UGCCUGUCUACACUUGCUGUGC    | Nmir_002                     | D                                   | D                   | NC                     | C         |

|          |            |                                                                    |                         |                                      |    |    |    |    |
|----------|------------|--------------------------------------------------------------------|-------------------------|--------------------------------------|----|----|----|----|
|          |            |                                                                    | ACAGCAGGCACAGACAGGCAG   | mmu-mir-214 (miRBase 8.0)            | D  | NA |    |    |
| MENC_015 | 9830169G21 | UGUAUUUGACAAGCUGAGUUGGACACUCUGUGUGUAGAGUGUCAGUUUGCAAUACCCC         | UGUCAGUUUGCAAUACCCC     | mmu-mir-223 (miRBase 8.0)            | D  | NA | NC | C  |
| MENC_016 | 5330411G14 | AGAGGUUGCCUUGGUGAAUUCGCUUUUAUGUUGAAUCACACAAAGGCAACUUUGU            | AUCACACAAAGGCAACUUUGU   | mmu-mir-377 (miRBase 8.0)            | D  | NA | NC | C  |
| MENC_017 | B230304K20 | CUCCUGACUCCAGGUCCUGUGUUACCUCGAAUAGCACUGGACUUGGAGUCAGAAGGC          | ACUGGACUUGGAGUCAGAAGGCC | Nmir_003 (miRBase 9.2: mmu-mir-422b) | D  | D  | NC | C  |
|          |            |                                                                    | CUCCUGACUCCAGGUCCUGUGU  | mmu-mir-378 (miRBase 8.0)            | ND | NA |    |    |
| MENC_018 | D930047H10 | AGCUGGUGUUGAAUCAGGCCGACGAGCAGCGCAUCCUUACCCGGCUAUUUCACGACACCAGGGUU  | AGCUGGUGUUGAAUC         | mmu-mir-138-2 (miRBase 8.0)          | NA | NA | NC | C  |
| MENC_019 | B130046N22 | AACCCGUAGAUCGAAACUUGUGCUGAUUCGACACAAAGCUGUCUAUAGGUUAG              | AACCCGUAGAUCGAAACUUGUG  | mmu-mir-100 (miRBase 8.0)            | NA | NA | NC | NC |
| MENC_020 | E130002N09 | AACAUUCAUUGCUGUCGGUGGUUGAACUGUGAGAAAAGCUCACUGAACAAUUGAAUGCAAC      | AACAUUCAUUGCUGUCGGUGGG  | mmu-mir-181b-1 (miRBase 8.0)         | NA | NA | NC | C  |
| MENC_021 | 2010103J01 | AUGACCUAUGAUUUGACAGACCGUGCAGCUGUGUUGUCUGCAUUCUGUAGGCCAAUA          | AUGACCUAUGAUUUGACAGAC   | mmu-mir-215 (miRBase 8.0)            | NA | NA | NC | NC |
| MENC_022 | 6430411K18 | UACGGUGAGCCUGCAUUUUUCAGAGAGGCUAGAUCUUGUUGAGAGGAUCAUGAUGGGUCCUGGUGU | UACGGUGAGCCUGCAUUUUUC   | mmu-mir-433 (miRBase 8.0)            | NA | NA | NC | C  |
| MENC_023 | A130074J23 | CUGAGGGGCAGAGAGCAGACUUUCUUAUUUCCAAAAGCUCGGUCUGAGGCCCUUCAGUC        | CUGAGGGGCAGAGAGCAGACU   | Nmir_004                             | D  | D  | NC | C  |
|          |            |                                                                    | AGCUCGGUCUGAGGCCCUUCAG  | Nmir_005 (miRBase 9.2: mmu-mir-423)  | D  | D  |    |    |
| MENC_024 | 1110017L17 | UCUACUCUUGACCAAAGUUUGUAAGAAACAUAACAGAAUUUGGGACGGGAGGGAGGAU         | AUUUGGGACGGGAGGGAGGAU   | Nmir_006                             | D  | D  | NC | NC |
| MENC_025 | 9830134K06 |                                                                    |                         |                                      |    |    | NC |    |
| MENC_026 | 2010209012 | AGGAAGCCUUGGAGGGCUGGAGGUGAUGGAUUUCCUCCGGUUCAGGGUCCACC              | AGGAAGCCUUGGAGGGCUGGAGG | Nmir_007 (miRBase 9.2: mmu-mir-671)  | D  | D  | NC | C  |
| MENC_027 | 2400007E14 | GAGGUUUCUGCUGCCGUGAGAUAGUAAACUGUCGUUUCGGGCGGGGCGUGGACGCCUCG        | GGC CGGGCGUGGACGCCUCG   | Nmir_008                             | D  | D  | C  | C  |
| MENC_028 | 2610025H06 | CUCUCCCUACCACCUGCCUUCUCCUGCUGGAGCAGGCAAGGAGAGGGUGAAGGGAG           | CUCUCCCUACCACCUGCCUCU   | Nmir_009                             | D  | D  | C  | NC |
|          |            |                                                                    | GCAAGGAGAGGGUGAAGGGAG   | Nmir_010                             | D  | D  |    |    |
| MENC_029 | 2900029M20 | GCGCCGACGCGGGGCCUGGCCAGUCUUUGCAGUAGAGCCCAUCUCUCUGGCGUUG            | GCGCCGACGCGGGGCCGUU     | Nmir_011                             | D  | ND | C  | C  |

|          |            |                                                                 |                        |                        |   |    |    |    |
|----------|------------|-----------------------------------------------------------------|------------------------|------------------------|---|----|----|----|
| MENC_030 | 6330521N15 | UCGCCUUGUCGUACUUGAGCUUUGCAUGGCGUCGCGGGGAGCCUCCCGGGCGAUG         | CGGGGAGCCUCCGGGGCGAUG  | Nmir_012               | D | ND | NC | C  |
| MENC_031 | 9330164G18 | UUCCCUUCUUCUUGGCCGGGUUGCCUCCGCCAGCUACCCCGGAGGAGCAGGAGGGA        | CCCCGAGGAGCAGGAGGGA    | Nmir_013               | D | D  | NC | C  |
| MENC_032 | 9330178L02 | CACACUAAUACAGUAGUCUUUGGAACACCAUGGACUCUCUGAUGGGUGAGGAG           | CUCUCUGAUGGGUGAGGAG    | Nmir_014               | D | D  | NC | NC |
| MENC_033 | A330012E03 | CUUUGGAUGGAGAAAGAGGGGGAAGUGCGAGCCUUCUACUCGUUCUGCCGGUGAG         | CUUUGGAUGGAGAAAGAGGGGG | Nmir_015               | D | D  | NC | NC |
|          |            |                                                                 | UCAACUCGUUCUGCCGGUGAG  | Nmir_016               | D | D  |    |    |
| MENC_034 | A430080L19 | CGCGGGGCCGGCUUUUUUCCGCCUUGCGGUGGACUAGAAAGGAGUACCCCGGGA          | CGCGGGGCCGGCUUUUUUCC   | Nmir_017               | D | ND | NC | NC |
| MENC_035 | A530020N14 | AGGUCAAGGUACACAGGGGAUAGAAAUUUUUCUGUAUUAUCUGUUUACCUUUGACCUAA     | AGGUCAAGGUACACAGGGGAUC | Nmir_018               | D | D  | C  | C  |
| MENC_036 | B130042C21 |                                                                 |                        |                        |   |    | C  |    |
| MENC_037 | C920030H05 |                                                                 |                        |                        |   |    | C  |    |
| MENC_038 | 4931433A09 | AGCGAUGGCCGAAUCUGCUUCCUUGGUUAGAUAUGAUGGUAUUCAGAUUCGCUCAUUCGUUGA | AGCGAUGGCCGAAUCUGCUUCC | Nmir_019               | D | D  | NC | NC |
| MENC_039 | D930019D21 |                                                                 |                        |                        |   |    | NC |    |
| MENC_040 | B230208K21 | AAGCUAGAAGAGGGCGGAGCCUGGAGGGGACACCCGGGCCGCCUCUCUGGUCCUUA        | GCCCGCCUCUCUGGUCCUUA   | Nmir_020               | D | D  | NC | NC |
| MENC_041 | B830003K07 | AUCCUUGAGUAGAGUAGAGGGCCCGCAGUCGCGGUCUACUCCGGGGGUCC              | CGCUGUACUCCGGGGGUCC    | Nmir_021               | D | D  | C  | C  |
| MENC_042 | C130030E18 | GGAGUUGUUGUAAUUGGACUUGAUAAAUGUUUAGAGGUGCAGUAGGCAUGACUU          | AGAGGUGCAGUAGGCAUGACUU | Nmir_022               | D | D  | C  | C  |
| MENC_043 | C530029I03 | CCUUCUUCUUCUCCUGAGACUAGGCCGGCAGUGGCCUCCUGAAGAGGAACAAGUGUG       | CCUUCUUCUUCUCCUGAGACA  | Nmir_023               | D | D  | NC | NC |
| MENC_044 | C530039003 |                                                                 |                        |                        |   |    | NC |    |
| MENC_045 | C920016N10 | CCGCCGGGCCUGCAAUUAUGAAGGAGCAGCCUCAUUGCGGGCACCGGGCAUCCGAGCA      | CCGCCGGGCCUGCAAUUAUGAA | Nmir_024               | D | ND | NC | C  |
|          |            |                                                                 | GCGGGCACCGGGCAUCCGAGCA | Nmir_025               | D | D  |    |    |
|          |            | GUUCUGCUCCUUGGAGGAGGUUCUGUUGCACACCUUCUCUUCAGGUAGAUAAACAU        | GUUCUGCUCCUUGGAGGAGG   | Nmir_026               | D | D  |    | NC |
| MENC_046 | E330019P22 | GCUCUGGAUGCGUUGAUGGUGGCUCCUUGGGGCCACCACAGUCCACCACGCGGUAG        | CACCAGUCCACCACGCGGUAG  | Nmir_027               | D | D  | NC | C  |
| MENC_047 | F730021I03 | UUUCUCUGUACCUGCCGAGGGUUCUCCUCCAGCCGCGAGCGGCGUAGAGGAGGG          | GCCAGCGGCGUAGAGGAGGG   | Nmir_028               | D | ND | NC | NC |
| MENC_048 | F830003A04 | AGCAACCUCCUAGGGUUGUUGAGAAUAAAUGAACUCGAGCAGCCUGAGGAGGGGUG        | UGCAGCAGCCUGAGGAGGGCU  | Nmir_029               | D | D  | NC | NC |
| MENC_049 | F830206C10 |                                                                 |                        |                        |   |    | NC |    |
| MENC_050 | F830211N05 | CUCCCCUCGUCUCUCUGGUGGUAUUUUUUUCUCCUACCGGAGCAGAGGAUCUGGAGGU      | GAGCAGCAGGGAUCUGGAGGU  | Nmir_030               | D | D  | NC | C  |
| MENC_051 | 10C0030C13 | ACUGGCGGAAAGGGCCACAGUGGACUUGUACACUGAUGCCCUAACCCGUCAGUCC         | CUGAUGCCCUAACCCGUCAGU  | Nmir_031 (mirBase_9.2: | D | ND | NC | C  |

|          |            |                                                                |                            |                                        |    |    |    |    |
|----------|------------|----------------------------------------------------------------|----------------------------|----------------------------------------|----|----|----|----|
|          |            |                                                                |                            | mmu-mir-675-3p)                        |    |    |    |    |
| MENC_052 | M5C1091A08 | CCCUCAGGCCACCAGAGCCCAGAUACCCAGAAAUCGGCUCUGGGUCUGUGGGGAG        | GAAAUUCGGCUCUGGGUCUGUGGGAG | Nmir_032 (mirBase_9.2:<br>mmu-mir-760) | D  | D  | NC | C  |
| MENC_053 | A430024D24 | AGGUACGGUUGCCACGUGAACACACAUUGUCUGUGAGCAUGUGGUUAGGCCGCCUCA      |                            |                                        | ND | NA | NC | NC |
| MENC_054 | K430345014 | GCCACCACUCCUGAGAGCCGGGGAUACCCAUCGCGACGUCACGGAGGAGUCGAGGCGCGG   |                            |                                        | ND | NA | NC | C  |
| MENC_055 | A130028J20 | CUUUUUAUGAGAGUUGAGAAGGCCUGGCCUUUGCCUUUUGUUUCUUAUGAGAAGGU       |                            |                                        | ND | NA | NC | C  |
| MENC_056 | A430106D13 | GAAUGUGAUUGCUUUGCAUGACUGCAAUGGAGAUUCAACAGAGCCAUCAUUGUUC        |                            |                                        | ND | NA | NC | C  |
| MENC_057 | A930005K04 | UCGCCAUCUGCCCCAGUUGGAGCGCAAGUCCUCCAGGUGGCGAGAUCAUCGACGACA      |                            |                                        | ND | NA | NC | NC |
| MENC_058 | 2610301N02 | GGGACACCCUUUGAAGAGUGUAAGUAAUUCUUUAUUAUCACAUUAAAAAGGGUGCCUU     |                            |                                        | ND | NA | NC | NC |
| MENC_059 | 2610301G21 |                                                                | ND                         | NC                                     |    |    |    |    |
| MENC_060 | 5330400K14 | GAGAGGUGUUGCUUUUGCCAAGAAGGCCACUUGGUCUUGGCAGAAGGCAGAGGCCUGCCC   |                            |                                        | ND | NA | NC | NC |
| MENC_061 | 9930009J05 | GAUCGGUACCCUCUGGGAACUGUGGGCUCUUAUACAGCUCAGGCGGUGGUUUGAUUCA     |                            |                                        | ND | NA | NC | NC |
| MENC_062 | B130001P19 | UUUCUGGCCAGUGAAGAGAUCAUAUAACCAGCUGGAAGCUCUGUACUGCCAGGCAUC      |                            |                                        | ND | NA | NC | NC |
| MENC_063 | D430036I17 | GUCUUGGACCAGAGGCCCAAGAUACCAGACUGGUGCUUGGAGCCGACAGGCCGGAUAG     |                            |                                        | ND | NA | NC | NC |
| MENC_064 | D630021F02 | GGAGAUAGGUUUGCACACUGUCUUGAGAACAAGUCCAGUGAGGAAUCCUGAUCUCUG      |                            |                                        | ND | NA | NC | NC |
|          |            | UGCGGUGUGUGUCCCCACCACGGCACUUGCCUUGUGGUGUCGGACUACAACCCAAC       |                            |                                        | ND | NA |    | NC |
| MENC_065 | F930104J06 | AGUGUGAGAAGACAAAUGAGAUACGUUAUGAAAGGUAACUGUAUUGUUUCUGCUCUGC     |                            |                                        | ND | NA | NC | C  |
| MENC_066 | I920046F24 | UGCCUGCAUCUGAUUGGUCUGUGGGGUAUUAUCUGAUAGCUAAUUGAUGGAGGCGAG      |                            |                                        | ND | NA | NC | NC |
| MENC_067 | A130050K09 | CAUAGGCUCCUUAUGCUUGAACUCUUGGUCUCUAGUUCUAGGACUUGUUUGGGAGUCUGUGG |                            |                                        | ND | NA | NC | NC |
| MENC_068 | 6720435L14 | GAGGAAGUCCGGCAGACUUGGGCUACAUUCUGGCCAGUUGACUUGGGGAGUUCUGU       |                            |                                        | ND | NA | NC | C  |
| MENC_069 | 4732419F12 | CUCUGGUGAAGCCUGGCUACUCUGAGAGAGUGGCCAGUUAUCAGCUGCAGCU           |                            |                                        | ND | NA | NC | NC |
| MENC_070 | A830006M23 | CCAGGACCCACCUCUGACUGAGCCUAGUGGCAGCCAGGUGACUUGCAAGCUUUGGGU      |                            |                                        | ND | NA | NC | NC |
| MENC_071 | B230380C22 | AGUGGCUUGCUAUUCUGGUAUCACUCCUACUACCCUGGUGAGAAACUAAGCAACAGCCUUC  |                            |                                        | ND | NA | NC | NC |
| MENC_072 | A230053F13 | CAUUCUGCAGCCAGUGGCCUCGUCUACCUUACAGGUACACAGGGUUAUGUAGGACGGG     |                            |                                        | ND | NA | NC | NC |
| MENC_073 | 1110014E10 | GGUUCAGCUAUGGUGCUAAUCAAUAGGUUUUCAGUGUCAGGUUCAAGCUGAAUGCCA      |                            |                                        | ND | NA | C  | C  |

|          |            |                                                                   |    |  |    |    |    |    |
|----------|------------|-------------------------------------------------------------------|----|--|----|----|----|----|
| MENC_074 | 2010208G19 | UUUGGGGAACUGCUGGAUUGCCUAAUUGUAGAGAGGUGUGUUGCUUGCCUGGGUAGUCCCAAAGA |    |  | ND | NA | C  | NC |
| MENC_075 | 2010013M14 | UGCAUGUCUGUACUUGCUGAGUUUCUGUGUCCUGCAGCAGUGGUCAGAAACUUGCUA         |    |  | ND | NA | NC | NC |
| MENC_076 | D130042G11 | AGGGGAGUUUUUUCAAAGAAUGGCUUCCAUAUUUAAGGAAACCCUCCCCAC               |    |  | ND | NA | NC | C  |
| MENC_077 | 3526402003 | UGCCCCUGACCCACUGCUUUUGCUGUACAUAGAGGCUAAGUGGGUGAAGUGGCAGG          |    |  | ND | NA | C  | C  |
| MENC_078 | 4. 93E+20  | UUAUCCGGUCCCUAAUCCUUAGGUACUUCACGACGUUGGGUGAGGGGAGCUGGAAGAU        |    |  | ND | NA | NC | C  |
| MENC_079 | 4930573F14 | UGAGCCACUUGGCCAUUUUAAAGGCUACACUUGAUUUAAAUGGGACCAAGUUCAUCAUG       |    |  | ND | NA | NC | NC |
| MENC_080 | 5830407M18 | CCAUGAGCUGCUCGCCUACAGCCUGGUCUCCAACUGCGGGUGAGCAGCUCUGGUG           |    |  | ND | NA | NC | NC |
| MENC_081 | 6030458J16 | GGGUCUGGGCUGGAAAAUCCUGGUGUUUGAAUUGUUCAGGUCCAGUUCAGACUCUUG         |    |  | ND | NA | NC | C  |
| MENC_082 | G530004A22 |                                                                   | NC |  |    |    |    |    |
| MENC_083 | G530143B20 |                                                                   | NC |  |    |    |    |    |
| MENC_084 | I530014C21 |                                                                   | NC |  |    |    |    |    |
| MENC_085 | 7420435F03 | CGCCUGGGCCUCAUGGAAUUGAUUGCUUUCGCAAGAUUCUGUAAGGGCCAGGUGUC          |    |  | ND | NA | NC | NC |
| MENC_086 | 9330159N21 | UUUCUUGGUCUGCCUGGCCUGUAAAUGUGUAUGAUAGAGCUAUCAGGCAUCGUAAGGCAACA    |    |  | ND | NA | NC | NC |
| MENC_087 | 9430042D23 | UGUGUUUGAUGCCAUAUUGGUUGCCAGUGGCACCGAGGUUGGCAUCAGACCCUUCUU         |    |  | ND | NA | NC | C  |
| MENC_088 | 9630058L18 | UCACAUACAAAAGUUGGGAUCUUGGGCCAGAAGUCCCAUCUUCUUGUGUGGAGA            |    |  | ND | NA | C  | C  |
| MENC_089 | 2610025H06 |                                                                   |    |  |    |    |    |    |
| MENC_090 | 6030473A16 |                                                                   |    |  |    |    |    |    |
| MENC_091 | 9. 93E+25  | GUGUGUGAUGUGUAUGUAGGCAAAUUAUACAUUUUAUACAUACACAGGUGCAUACAC         |    |  | ND | NA | NC | C  |
| MENC_092 | A130012M23 | AUGCUUGGGAAGGAGCCACCUUGCUAUGGAAAGGAGUGGACUCCUGUUCAGCAUAG          |    |  | ND | NA | NC | NC |
| MENC_093 | A330041B18 | UUUUGUCUCCUCUGCAGUCUGACUGGUUCUCAGUGAUGAUGAGGACAAAGGAGAGAGUA       |    |  | ND | NA | NC | C  |
| MENC_094 | A430103D08 | AAAAGGCUACCCUACUACUACCUCAAGUUGAUGGGAUGGAGAAAGCACUUUAC             |    |  | ND | NA | NC | NC |
| MENC_095 | A430080K14 | GUUUGCUCAUUCCCUUCGGAUUUAGGUACGGUAAAUUUGGAAGAGGUGGGGAGCG           |    |  | ND | NA | C  | C  |
| MENC_096 | I730043G20 |                                                                   | C  |  |    |    |    |    |
| MENC_097 | A630093L23 | UGCGAGGAUUGAAUUGGCUAUCUCUGUAUGAGAAUGGCAUCAAUGGGAUCCUUGCAGA        |    |  | ND | NA | C  | C  |

|          |            |                                                                |    |  |    |    |    |    |
|----------|------------|----------------------------------------------------------------|----|--|----|----|----|----|
| MENC_098 | D030040M08 |                                                                |    |  |    |    | C  |    |
| MENC_099 | A730069D24 | UCGGCAAACUCCAAGAUACAGAGGACAUUCUUGACAGAUGUGUCUUGGAAGAGUCGGAGAGU |    |  | ND | NA | NC | NC |
| MENC_100 | B230339C10 | GCAGUUCUGACAUUUUGGUGUGUUCAUUGUUGGGCUAUGCACAGAAUGUCCUACUGUCUU   |    |  | ND | NA | NC | C  |
| MENC_101 | B230399F14 | UUUGUUUUUCCUGCUUCCUUUUUCCCAUGGAGCGUGGGGAGCAGGGCCUCAGAGCAAAGU   |    |  | ND | NA | NC | C  |
| MENC_102 | B230206C19 |                                                                | NC |  |    |    |    |    |

<sup>a</sup> : Nmir\_XXX indicates predicted miRNAs which have not yet been registered in miRBase 8.0

<sup>b</sup> : D: detected; ND: not detected; NA: not applicable

<sup>c</sup> : C: conserved between mouse and human; NC: not conserved between mouse and human;

**Table S3: List of probes for microarray**

|          |                                             |
|----------|---------------------------------------------|
| PROBE_1  | TTTTTTTTTTTTTTTTTACCCGACCAACAGCACAAACTACTAC |
| PROBE_2  | TTTTTTTTTTTTTTTTTAGGCAGTAGCTTGCGCAGTTATCTCC |
| PROBE_3  | TTTTTTTTTTTTTTTTTTAAATCAAGGTCCGCTGTGAACA    |
| PROBE_4  | TTTTTTTTTTTTTTTTTTGGCATTACCGCGTGCCTTAAT     |
| PROBE_5  | TTTTTTTTTTTTTTTTTACAGTAGCACAATGTGAAAAGAGCTC |
| PROBE_6  | TTTTTTTTTTTTTTTTTCGATGCCCTTTAACATTGCACTGCT  |
| PROBE_7  | TTTTTTTTTTTTTTTTTACTTACAGTATATGATGATATCCCAG |
| PROBE_8  | TTTTTTTTTTTTTTTTTGACTAGTACATCATCTATACTGTAGT |
| PROBE_9  | TTTTTTTTTTTTTTTTTGTAATGGTAACGGTTTCCTCGCCATT |
| PROBE_10 | TTTTTTTTTTTTTTTTTGAGCAGCAAGAGAACCGTTACCATT  |
| PROBE_11 | TTTTTTTTTTTTTTTTTAACAGCTGCTTTGGGATTCCGTTGC  |
| PROBE_12 | TTTTTTTTTTTTTTTTTAGGGAACGAAATCCAAGTGCAGCTGG |
| PROBE_13 | TTTTTTTTTTTTTTTTTCCACAAAGAAGTATATGCATAGGA   |
| PROBE_14 | TTTTTTTTTTTTTTTTTCATCTTCCCATGCGCTATACCTCTTT |
| PROBE_15 | TTTTTTTTTTTTTTTTTGACAGACTCCGGTGAATGAAGGACA  |
| PROBE_16 | TTTTTTTTTTTTTTTTTCTGAGCTTCACTCCACTGAAATCT   |
| PROBE_17 | TTTTTTTTTTTTTTTTTTCGACTTGGTCCGTTTGACCAGC    |
| PROBE_18 | TTTTTTTTTTTTTTTTTTGTAGCTGGTTGAAGGGACCAAAC   |
| PROBE_19 | TTTTTTTTTTTTTTTTTCTATGAGGATATAAAGAAGCATGT   |
| PROBE_20 | TTTTTTTTTTTTTTTTTCCACACACTTCCTTACATCCATA    |



|          |                                             |
|----------|---------------------------------------------|
| PROBE_21 | TTTTTTTTTTTTTTTTTAAACTATGCAACCTACTACCTCT    |
| PROBE_22 | TTTTTTTTTTTTTTTTTAGGCAGCAGGTCGTATAGTAACTCC  |
| PROBE_23 | TTTTTTTTTTTTTTTTTTCATAAAGCTGCCACTGAAGAACT   |
| PROBE_24 | TTTTTTTTTTTTTTTTTCAACAGTTCTTCAACTGGCAGCTTA  |
| PROBE_25 | TTTTTTTTTTTTTTTTTGGATCCCTGGGACCATACCTAGAA   |
| PROBE_26 | TTTTTTTTTTTTTTTTTGGTTCTAGGATAGGCCAGGGGCCT   |
| PROBE_27 | TTTTTTTTTTTTTTTTTCTGCACAGCAAGTGTAGACAGGCAGA |
| PROBE_28 | TTTTTTTTTTTTTTTTTGACTGCCTGCTGTGCCTGCTGTAC   |
| PROBE_29 | TTTTTTTTTTTTTTTTTGTCCAACCTCAGCTTGTCAAATACAC |
| PROBE_30 | TTTTTTTTTTTTTTTTTGGGGTATTGACAACTGACACTCT    |
| PROBE_31 | TTTTTTTTTTTTTTTTTGCGAATTCACCAAGGGCAACCTCT   |
| PROBE_32 | TTTTTTTTTTTTTTTTTAAACAAAAGTTGCCTTGTGTGATTC  |
| PROBE_33 | TTTTTTTTTTTTTTTTTACACACAGGACCTGGAGTCAGGAGCC |
| PROBE_34 | TTTTTTTTTTTTTTTTTAGGCCTCTGACTCCAAGTCCAGTGC  |
| PROBE_35 | TTTTTTTTTTTTTTTTTAAAGTCTCGCTCTCTGCCCTCAGCC  |
| PROBE_36 | TTTTTTTTTTTTTTTTTAAGACTGAGGGGCTCAGACCGAGCT  |
| PROBE_37 | TTTTTTTTTTTTTTTTTACAAAACCTTGGTCAAGAGTAGAAA  |
| PROBE_38 | TTTTTTTTTTTTTTTTTATCCTCCCTCCCGTCCCAAATTC    |
| PROBE_39 | TTTTTTTTTTTTTTTTTCCTCCAGCCCTCCAGGGCTTCCTCC  |
| PROBE_40 | TTTTTTTTTTTTTTTTTGAGGTGGAGCCCTGAGAACCGGAGGA |
| PROBE_41 | TTTTTTTTTTTTTTTTTCATCTCAGGCGCAGCAGATACCTCT  |

|          |                                             |
|----------|---------------------------------------------|
| PROBE_42 | TTTTTTTTTTTTTTTTTCGAGGCGTCCAGCGCCCGCGCCCG   |
| PROBE_43 | TTTTTTTTTTTTTTTTTGAAGAGGCAGGTGGTAGGGAGAGAG  |
| PROBE_44 | TTTTTTTTTTTTTTTTTCCCTCCCTTCACCCTCCTCCTTGCCT |
| PROBE_45 | TTTTTTTTTTTTTTTTTGCAACGGCCCCGCGCTGCCGGCGCTG |
| PROBE_46 | TTTTTTTTTTTTTTTTTACCAACGCCAGAGAGATGGGGCTCTA |
| PROBE_47 | TTTTTTTTTTTTTTTTTAAAGCTACAAGTACGACAAGGGGATC |
| PROBE_48 | TTTTTTTTTTTTTTTTTCGCATCGCCCCGGGAGGCTCCCGCA  |
| PROBE_49 | TTTTTTTTTTTTTTTTTCAACCCGGCCAAGAAGAAGAGAAAA  |
| PROBE_50 | TTTTTTTTTTTTTTTTTCCTCCTCCTCGCTCCTCGGGGGTA   |
| PROBE_51 | TTTTTTTTTTTTTTTTTAAAGACATCACTGTAATGAGTGTGGG |
| PROBE_52 | TTTTTTTTTTTTTTTTTCCTCCTCACCCACCATCAGAGAGTC  |
| PROBE_53 | TTTTTTTTTTTTTTTTTCCCCCTCTTCTCCATCCAAAGCA    |
| PROBE_54 | TTTTTTTTTTTTTTTTTCCTCACCGGACAGAACGAGTTGAAG  |
| PROBE_55 | TTTTTTTTTTTTTTTTTCGGGAAATAAAGCCGCCCCCGCGGA  |
| PROBE_56 | TTTTTTTTTTTTTTTTTATCCCGGGGTGACTCCTTCTAGT    |
| PROBE_57 | TTTTTTTTTTTTTTTTTTGATCCCCTGTGAACCTTGACCTAT  |
| PROBE_58 | TTTTTTTTTTTTTTTTTTAGGTCAAAGTAAACAGATTATA    |
| PROBE_59 | TTTTTTTTTTTTTTTTTGAGGAAGCAGATTCGGCCATCGCTGA |
| PROBE_60 | TTTTTTTTTTTTTTTTTAATCAACGGAATGAGCAGAATCTGAA |
| PROBE_61 | TTTTTTTTTTTTTTTTTCCAGGCTCGCCCTCTTCTAGCTTCC  |
| PROBE_62 | TTTTTTTTTTTTTTTTTATGAAGGACCAGAGAGGGCGCCCG   |

|          |                                              |
|----------|----------------------------------------------|
| PROBE_63 | TTTTTTTTTTTTTTTTCTCAACTCGTTCACCTCAGGGAATCC   |
| PROBE_64 | TTTTTTTTTTTTTTTTTCGGGACCCCGGAGTACGAGCGGCA    |
| PROBE_65 | TTTTTTTTTTTTTTTTGTCCAATTATACAGCAAACACTCCCA   |
| PROBE_66 | TTTTTTTTTTTTTTTTTCAAGTCATGCCTACTGCACCTCTAA   |
| PROBE_67 | TTTTTTTTTTTTTTTTTCATGTCTCAGGAAGAAGAAGAGGAG   |
| PROBE_68 | TTTTTTTTTTTTTTTTTCCCACACTTGTCTCTTCCAGGAGC    |
| PROBE_69 | TTTTTTTTTTTTTTTTTCCTTCATATTGCAGGGCCCGGGCG    |
| PROBE_70 | TTTTTTTTTTTTTTTTTCATGCTCGGATGCCCGTGCCGCAC    |
| PROBE_71 | TTTTTTTTTTTTTTTTTAACCTCCCTCCAGAGGAGCAGAACAG  |
| PROBE_72 | TTTTTTTTTTTTTTTTTAAATGTTAATCTACCTGAAGAGAGG   |
| PROBE_73 | TTTTTTTTTTTTTTTTTCGACCATCAAACGCATCCAGCAGCAG  |
| PROBE_74 | TTTTTTTTTTTTTTTTTCCCTACCGGTGGTGGGACTGGTGGT   |
| PROBE_75 | TTTTTTTTTTTTTTTTTCCCTGCCGGCAGGTAGCAGAGAAAAG  |
| PROBE_76 | TTTTTTTTTTTTTTTTTGCCCTCCTCTCAGCCGCTGGCGG     |
| PROBE_77 | TTTTTTTTTTTTTTTTTCTCACAACAACCCTAGGAGGTTGCTC  |
| PROBE_78 | TTTTTTTTTTTTTTTTTTCAGCCCTGCCTCAGGCTGCTGCAG   |
| PROBE_79 | TTTTTTTTTTTTTTTTTCCAGCAAGAGACAGCGAGGGGAGTG   |
| PROBE_80 | TTTTTTTTTTTTTTTTTCCACCTCCAGATCCTCTGCTGCTCCC  |
| PROBE_81 | TTTTTTTTTTTTTTTTTACTGTGGGCCCTTCCGCACCAGTCC   |
| PROBE_82 | TTTTTTTTTTTTTTTTTAGGGACTGAGCGGTTAGGGCATAACAG |
| PROBE_83 | TTTTTTTTTTTTTTTTTATCCGGGCTCTGGTGGCCTGAGGGGG  |

|           |                                                |
|-----------|------------------------------------------------|
| PROBE_84  | TTTTTTTTTTTTTTTTTGCTCCCCACAGACCCAGAGCCGAATT    |
| PROBE_85  | TTTTTTTTTTTTTTTTTTTTGTGTTACAGTGGCAACCGTACCT    |
| PROBE_86  | TTTTTTTTTTTTTTTTTTTTGAGGACGGCGCTAACCCATGCT     |
| PROBE_87  | TTTTTTTTTTTTTTTTTTTTCCCCGGCTCTCAGGAAGTGGTGGC   |
| PROBE_88  | TTTTTTTTTTTTTTTTTTTTCCGCCGCTCGACTCCTCCGTGAC    |
| PROBE_89  | TTTTTTTTTTTTTTTTTTTTGGCCTTCTCAACTCTCATGAAAAAGG |
| PROBE_90  | TTTTTTTTTTTTTTTTTTTTACCTTCTCATGAAGAAACAAAAGG   |
| PROBE_91  | TTTTTTTTTTTTTTTTTTTTGTCATGCAAAGCAATCACACATTCAT |
| PROBE_92  | TTTTTTTTTTTTTTTTTTTTAGGAGAACATTGATGGCTCTGTTGAC |
| PROBE_93  | TTTTTTTTTTTTTTTTTTTTGCTCCAAGTGGGCAGATCGGCGACA  |
| PROBE_94  | TTTTTTTTTTTTTTTTTTCATGTCGTCGATCATCTGCCACCT     |
| PROBE_95  | TTTTTTTTTTTTTTTTTCTTACCATCTTCAAAGGGTGTCCCTT    |
| PROBE_96  | TTTTTTTTTTTTTTTTTCAAAGGGCACCTTTTAATATGTAGA     |
| PROBE_97  | TTTTTTTTTTTTTTTTTCTTGGCAAAGACAACACCTCTCCC      |
| PROBE_98  | TTTTTTTTTTTTTTTTTTGGGGCAGCCCTCTGCCTTCTGCCAA    |
| PROBE_99  | TTTTTTTTTTTTTTTTTACAGTCCCAGAGGGGTACCGATCGT     |
| PROBE_100 | TTTTTTTTTTTTTTTTTTCATGAATCAAACCACCAGCTGAGCT    |
| PROBE_101 | TTTTTTTTTTTTTTTTTTGTAGATCTTCACTGGCCAGAAACC     |
| PROBE_102 | TTTTTTTTTTTTTTTTTTCAGATGCCTGGCAGTAACAGAGCTTC   |
| PROBE_103 | TTTTTTTTTTTTTTTTTCTTGGCCGCTCTGGTCCAAGACTG      |
| PROBE_104 | TTTTTTTTTTTTTTTTTCTATCCGGCACTGGCGGCTCCAAG      |

|           |                                            |
|-----------|--------------------------------------------|
| PROBE_105 | TTTTTTTTTTTTTTTTAGACAGTGTGCAAACCTGATCTCCAG |
| PROBE_106 | TTTTTTTTTTTTTTTTGGCGAGAGATCAGGATTCCTCACTGG |
| PROBE_107 | TTTTTTTTTTTTTTTTCGTGGTGGGGACACACACCCGCAAC  |
| PROBE_108 | TTTTTTTTTTTTTTTTGGGTGGGTTGTAGTCCGACCACCAC  |
| PROBE_109 | TTTTTTTTTTTTTTTTATCTCATTTTGTCTTCTCACACTGG  |
| PROBE_110 | TTTTTTTTTTTTTTTTATGCAGAGCGAGAAAACAATACAGTT |
| PROBE_111 | TTTTTTTTTTTTTTTTCCACAGACCAATCAGATGCAGGCAAT |
| PROBE_112 | TTTTTTTTTTTTTTTTCTCTCGCCTCCATCAATTAGCTATCA |
| PROBE_113 | TTTTTTTTTTTTTTTTAGAGTTCAAGCATAGGAGCCTATGGA |
| PROBE_114 | TTTTTTTTTTTTTTTTAACCACAGACTCCCAAACAGTGCC   |
| PROBE_115 | TTTTTTTTTTTTTTTTGCCACAAGTCTGCCGACTTCCTCAC  |
| PROBE_116 | TTTTTTTTTTTTTTTTAACGAGAACTACCCAAGTCAAAC    |
| PROBE_117 | TTTTTTTTTTTTTTTTGTAGGAGCCAGGCTTCAGCCAGAGGC |
| PROBE_118 | TTTTTTTTTTTTTTTTACAGCTGCAGCTGAAATCACTGGCCA |
| PROBE_119 | TTTTTTTTTTTTTTTTCAGTGACAGAGGTGGGCTCCTGGGT  |
| PROBE_120 | TTTTTTTTTTTTTTTTAAACCAAAGCTTGCAAGTGACACCT  |
| PROBE_121 | TTTTTTTTTTTTTTTTGATACCAGAATAGCAACAGCCACTTC |
| PROBE_122 | TTTTTTTTTTTTTTTTATGAAGGGCTGTGCTTAGTTTCTAC  |
| PROBE_123 | TTTTTTTTTTTTTTTTCAGGCCACTGGGCTGCAGGAAATGGG |
| PROBE_124 | TTTTTTTTTTTTTTTTAGCCCGTCTACATAACCCTGTGTAC  |
| PROBE_125 | TTTTTTTTTTTTTTTTATTGATTAGCACCATAGCTGAACCAA |

|           |                                              |
|-----------|----------------------------------------------|
| PROBE_126 | TTTTTTTTTTTTTTTTTAATGGCATTACAGCTATGGAACCTGA  |
| PROBE_127 | TTTTTTTTTTTTTTTTTAGGCATATCCAGCAGTCCCCAAACA   |
| PROBE_128 | TTTTTTTTTTTTTTTTTGTTCTTTGGGGACTACCCAGGCAAGC  |
| PROBE_129 | TTTTTTTTTTTTTTTTTAACTCAGCAAAGTACAGACATGCAGG  |
| PROBE_130 | TTTTTTTTTTTTTTTTTTCAGCATGTTCTGACCACTGCTGC    |
| PROBE_131 | TTTTTTTTTTTTTTTTTATTCTTTTGAAGAAAACCCCCTCT    |
| PROBE_132 | TTTTTTTTTTTTTTTTTATGTGGGGAGGGGTTCCCTCAAAT    |
| PROBE_133 | TTTTTTTTTTTTTTTTTCAAACAGCAGTGGGGTCAGGGGCAGG  |
| PROBE_134 | TTTTTTTTTTTTTTTTTCACCTGCCCACTCACCCCACTTAGC   |
| PROBE_135 | TTTTTTTTTTTTTTTTTAAAGGATTAAGGGAACCGATAAAC    |
| PROBE_136 | TTTTTTTTTTTTTTTTTGTGATCTCCAGTCCCCTCACCCAAC   |
| PROBE_137 | TTTTTTTTTTTTTTTTTCTTAAATGGGCCAAGTGGCTCAGA    |
| PROBE_138 | TTTTTTTTTTTTTTTTTGCATGATGAACTTGGTCCCAATTTT   |
| PROBE_139 | TTTTTTTTTTTTTTTTTGGCTGTAGGCGGAGCAGCTCATGGGC  |
| PROBE_140 | TTTTTTTTTTTTTTTTTGGCACCAGGAGCTGCTACCGCGCAG   |
| PROBE_141 | TTTTTTTTTTTTTTTTTCCAGGATTTTCCAGCCAGACCCTA    |
| PROBE_142 | TTTTTTTTTTTTTTTTTATCAAGAGTCTGAACTGGACCTGAAC  |
| PROBE_143 | TTTTTTTTTTTTTTTTTGTGATCATTTCCATGAGGCCAGGCGTA |
| PROBE_144 | TTTTTTTTTTTTTTTTTGGACACCTGGCCCTTACAGAAGATC   |
| PROBE_145 | TTTTTTTTTTTTTTTTTACAGAGGCCAGGACACCAAGAACT    |
| PROBE_146 | TTTTTTTTTTTTTTTTTGTGCTTAGCATGCCTGATAGC       |

|           |                                           |
|-----------|-------------------------------------------|
| PROBE_147 | TTTTTTTTTTTTTTTCAACCATTATTGGCATCAAACACAGT |
| PROBE_148 | TTTTTTTTTTTTTTTACAAAGAGGGTCTGATGCCAACCTCG |
| PROBE_149 | TTTTTTTTTTTTTTTAGATCCACCATCTTTGTATGTGAGC  |
| PROBE_150 | TTTTTTTTTTTTTTTGTCTCACACAAAAGAAGTGGGACT   |
| PROBE_151 | TTTTTTTTTTTTTTTGCCTACATACACATCACACACAC    |
| PROBE_152 | TTTTTTTTTTTTTTTATGTGTATGCACCTGTGTATGTATAA |
| PROBE_153 | TTTTTTTTTTTTTTTAGCAGGTGGCTCCTCCCAAGCATAT  |
| PROBE_154 | TTTTTTTTTTTTTTTCTATGCTGGGAACAGGAAGTCCAC   |
| PROBE_155 | TTTTTTTTTTTTTTTAGTCAGACTGCAGAGGAGACAAAAGA |
| PROBE_156 | TTTTTTTTTTTTTTTCTTACTCTCTCTCCTTGTCTCATC   |
| PROBE_157 | TTTTTTTTTTTTTTTGGTAGTGATGGAGGTGAGCCTTTTTC |
| PROBE_158 | TTTTTTTTTTTTTTTCCGTAAAAGTGCTTCTCCATCCCA   |
| PROBE_159 | TTTTTTTTTTTTTTTAAATCCGAAGGAAATGAGCAAACC   |
| PROBE_160 | TTTTTTTTTTTTTTTTCGCTCGCCACCTCTCCAATTT     |
| PROBE_161 | TTTTTTTTTTTTTTTAGATGAGCCAATCAATCCTCGCACC  |
| PROBE_162 | TTTTTTTTTTTTTTTCATCTGCAAGGATCCCATGATGCCA  |
| PROBE_163 | TTTTTTTTTTTTTTTCTCTGTATCTTGAAGTTGCCGAGT   |
| PROBE_164 | TTTTTTTTTTTTTTTGCACCTCTCCGACTCTCCAAGACACA |
| PROBE_165 | TTTTTTTTTTTTTTTAAACACCAAAAATGTCAGAAGTCTT  |
| PROBE_166 | TTTTTTTTTTTTTTTCAAAGACAGTAGGAACATTCTGTGCA |
| PROBE_167 | TTTTTTTTTTTTTTTGGAAAAGGAAGCAGGAAAAACAAAAC |

PROBE\_168

TTTTTTTTTTTTTTAGACTTTGCTCTGAGGCCCTGCTCCC



**Table S4: List of Stem-loop RT-PCR primers**

|            |                |                                                    |
|------------|----------------|----------------------------------------------------|
| all miRNAs | Reverse primer | GTGCAGGGTCCGAGGT                                   |
| mmu-let-7a | RT primer      | GTCGTATCCAGTGCAGGGTCCGAGGTATTCGCACTGGATACGACACTATA |
| mmu-let-7a | Forward primer | GCCCTGAGGTAGTAGGTTG                                |
| Nmir_001   | RT primer      | GTCGTATCCAGTGCAGGGTCCGAGGTATTCGCACTGGATACGACTTACAG |
| Nmir_001   | Forward primer | GCCCGGATATCATCATATA                                |
| Nmir_002   | RT primer      | GTCGTATCCAGTGCAGGGTCCGAGGTATTCGCACTGGATACGACGCACAG |
| Nmir_002   | Forward primer | GCCCTGCCTGTCTACTTGG                                |
| Nmir_004   | RT primer      | GTCGTATCCAGTGCAGGGTCCGAGGTATTCGCACTGGATACGACAGTCTC |
| Nmir_004   | Forward primer | GCCCTGAGGGGAGAGAGC                                 |
| Nmir_006   | RT primer      | GTCGTATCCAGTGCAGGGTCCGAGGTATTCGCACTGGATACGACATCCTC |
| Nmir_006   | Forward primer | GCCCATTTGGGACGGGAGG                                |
| Nmir_008   | RT primer      | GTCGTATCCAGTGCAGGGTCCGAGGTATTCGCACTGGATACGACCGAGGC |
| Nmir_008   | Forward primer | GCCCGCGCGGCGCTGGAC                                 |
| Nmir_009   | RT primer      | GTCGTATCCAGTGCAGGGTCCGAGGTATTCGCACTGGATACGACAGAGGC |
| Nmir_009   | Forward primer | GCCCTCTCCCCTACCACCT                                |
| Nmir_010   | RT primer      | GTCGTATCCAGTGCAGGGTCCGAGGTATTCGCACTGGATACGACCTCCCT |
| Nmir_010   | Forward primer | GCCCGCAAGGGAGAGGGTGA                               |
| Nmir_011   | RT primer      | GTCGTATCCAGTGCAGGGTCCGAGGTATTCGCACTGGATACGACAACGGC |
| Nmir_011   | Forward primer | GCCCGCGCCGGCAGCGGGG                                |
| Nmir_012   | RT primer      | GTCGTATCCAGTGCAGGGTCCGAGGTATTCGCACTGGATACGACCATCGC |

|          |                |                                                    |
|----------|----------------|----------------------------------------------------|
| Nmir_012 | Forward primer | GCCCCGGGAGCCTCCCGG                                 |
| Nmir_013 | RT primer      | GTCGTATCCAGTGCAGGGTCCGAGGTATTCGCACTGGATACGACTCTCC  |
| Nmir_013 | Forward primer | GCCCCCCCAGGAGGACGA                                 |
| Nmir_014 | RT primer      | GTCGTATCCAGTGCAGGGTCCGAGGTATTCGCACTGGATACGACTCTCC  |
| Nmir_014 | Forward primer | GCCCCTCTCTGATGGTGGT                                |
| Nmir_015 | RT primer      | GTCGTATCCAGTGCAGGGTCCGAGGTATTCGCACTGGATACGACCCCT   |
| Nmir_015 | Forward primer | GCCCCTTGGATGGAGAAAG                                |
| Nmir_016 | RT primer      | GTCGTATCCAGTGCAGGGTCCGAGGTATTCGCACTGGATACGACTCACC  |
| Nmir_016 | Forward primer | GCCCTCAACTCGTTCTGTCC                               |
| Nmir_017 | RT primer      | GTCGTATCCAGTGCAGGGTCCGAGGTATTCGCACTGGATACGACGAAAT  |
| Nmir_017 | Forward primer | GCCCCGCGGGGCGGCTTT                                 |
| Nmir_018 | RT primer      | GTCGTATCCAGTGCAGGGTCCGAGGTATTCGCACTGGATACGACGATCCC |
| Nmir_018 | Forward primer | GCCCAGGTCAAGGTTACAG                                |
| Nmir_019 | RT primer      | GTCGTATCCAGTGCAGGGTCCGAGGTATTCGCACTGGATACGACGGAAGC |
| Nmir_019 | Forward primer | GCCCAGGATGGCCGAATCT                                |
| Nmir_020 | RT primer      | GTCGTATCCAGTGCAGGGTCCGAGGTATTCGCACTGGATACGACTGAAGG |
| Nmir_020 | Forward primer | GCCCGCCGCCCTCTCTGGT                                |
| Nmir_021 | RT primer      | GTCGTATCCAGTGCAGGGTCCGAGGTATTCGCACTGGATACGACGACCC  |
| Nmir_021 | Forward primer | GCCCCGCTCGTACTCCCG                                 |
| Nmir_022 | RT primer      | GTCGTATCCAGTGCAGGGTCCGAGGTATTCGCACTGGATACGACAAGTCA |
| Nmir_022 | Forward primer | GCCCAGAGGTGCAGTAGGCA                               |

|                           |                |                                                   |
|---------------------------|----------------|---------------------------------------------------|
| Nmir_023                  | RT primer      | GTCGTATCCAGTGCAGGGTCCGAGGTATTGCACTGGATACGACTGTCTC |
| Nmir_023                  | Forward primer | GCCCCCTTCTTCTTCTCCT                               |
| Nmir_024                  | RT primer      | GTCGTATCCAGTGCAGGGTCCGAGGTATTGCACTGGATACGACTTCATA |
| Nmir_024                  | Forward primer | GCCCCCGCCGGGCCCTGCAA                              |
| Nmir_025                  | RT primer      | GTCGTATCCAGTGCAGGGTCCGAGGTATTGCACTGGATACGACTGCTCG |
| Nmir_025                  | Forward primer | GCCCGCGGGCACCGGGCATC                              |
| Nmir_026                  | RT primer      | GTCGTATCCAGTGCAGGGTCCGAGGTATTGCACTGGATACGACCCTCCC |
| Nmir_026                  | Forward primer | GCCCGTTCTGCTCCTCTGGA                              |
| Nmir_027                  | RT primer      | GTCGTATCCAGTGCAGGGTCCGAGGTATTGCACTGGATACGACCTACCG |
| Nmir_027                  | Forward primer | GCCCCACCAGTCCCACCACG                              |
| Nmir_028                  | RT primer      | GTCGTATCCAGTGCAGGGTCCGAGGTATTGCACTGGATACGACCCTCC  |
| Nmir_028                  | Forward primer | GCCCGCCAGCGGGCTGAAGA                              |
| Nmir_029                  | RT primer      | GTCGTATCCAGTGCAGGGTCCGAGGTATTGCACTGGATACGACAGCCCT |
| Nmir_029                  | Forward primer | GCCCTGCAGCAGCCTGAGGC                              |
| Nmir_030                  | RT primer      | GTCGTATCCAGTGCAGGGTCCGAGGTATTGCACTGGATACGACACCTCC |
| Nmir_030                  | Forward primer | GCCCGAGCAGCAGAGGATCT                              |
| Nmir_003:<br>mmu-miR-422b | RT primer      | GTCGTATCCAGTGCAGGGTCCGAGGTATTGCACTGGATACGACGGCCTT |
| Nmir_003:<br>mmu-miR-422b | Forward primer | GCCCCTGGACTTGGAGTCAG                              |
| Nmir_005:<br>mmu-miR-423  | RT primer      | GTCGTATCCAGTGCAGGGTCCGAGGTATTGCACTGGATACGACCTGAGG |
| Nmir_005:<br>mmu-miR-423  | Forward primer | GCCCAGCTCGGTCTGAGGCC                              |
| Nmir_007:<br>mmu-miR-671  | RT primer      | GTCGTATCCAGTGCAGGGTCCGAGGTATTGCACTGGATACGACCCTCCA |

|                             |                |                                                    |
|-----------------------------|----------------|----------------------------------------------------|
| Nmir_007:<br>mmu-miR-671    | Forward primer | GCCCAGGAAGCCCTGGAGGGGC                             |
| Nmir_031:<br>mmu-miR-675-3p | RT primer      | GTCGTATCCAGTGCAGGGTCCGAGGTATTCGCACTGGATACGACTGAG   |
| Nmir_031:<br>mmu-miR-675-3p | Forward primer | GCCCCTGTATGCCCTAACCG                               |
| Nmir_032:<br>mmu-miR-760    | RT primer      | GTCGTATCCAGTGCAGGGTCCGAGGTATTCGCACTGGATACGACCTCCCC |
| Nmir_032:<br>mmu-miR-760    | Forward primer | GCCCGAAATTCGGCTCTGGGTCTGT                          |
